# Supplementary material for: Pressure-induced metallization in MoSe2 under different pressure conditions
Source: Royal Society of Chemistry journal article supplement (doi:10.1039/c8ra09441a), 2019-01-01
Supplement: c8ra09441a1.pdf [file c8ra09441a1.pdf]

## Supplementary Information

### Pressure-induced metallization in MoSe<sub>2</sub> under different pressure conditions

Linfei Yang,<sup>ab</sup> Lidong Dai,<sup>\*a</sup> Heping Li,<sup>a</sup> Haiying Hu,<sup>a</sup> Kaixiang Liu,<sup>ab</sup> Chang Pu,<sup>ab</sup> Meiling Hong<sup>ab</sup> and Pengfei Liu<sup>c</sup>

<sup>a</sup> *Key Laboratory of High-Temperature and High-Pressure Study of the Earth's Interior, Institute of Geochemistry, Chinese Academy of Sciences, Guiyang, Guizhou 550081, China*

<sup>b</sup> *University of Chinese Academy of Sciences, Beijing 100049, China*

<sup>c</sup> *State Key Laboratory of Structural Chemistry, Fujian Institute of Research on the Structure of Matter, Chinese Academy of Sciences, Fuzhou, Fujian 350002, China*

\*Corresponding author. *Email address:* [dailidong@vip.gyig.ac.cn](mailto:dailidong@vip.gyig.ac.cn).

### Supplementary Figures

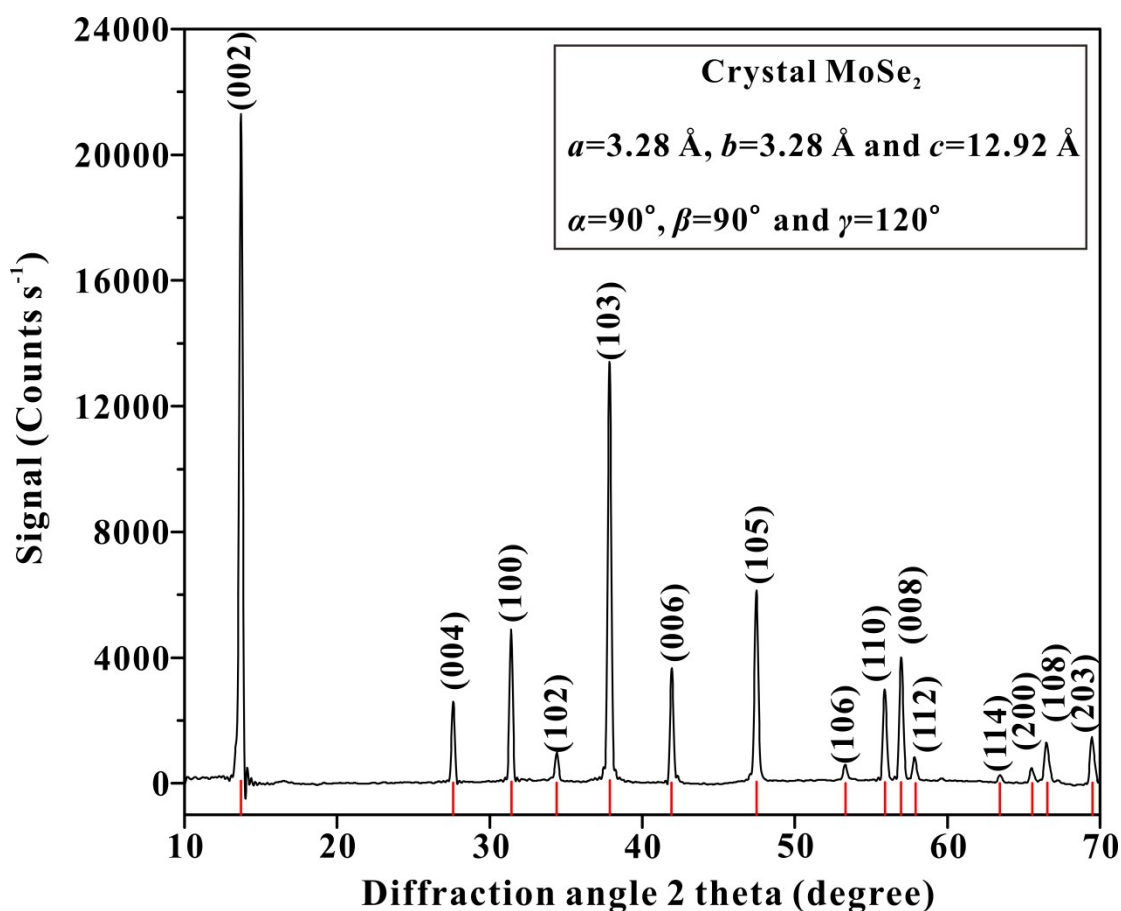

Fig. S1 The X-ray powder diffraction of crystal MoSe<sub>2</sub> at ambient conditions.

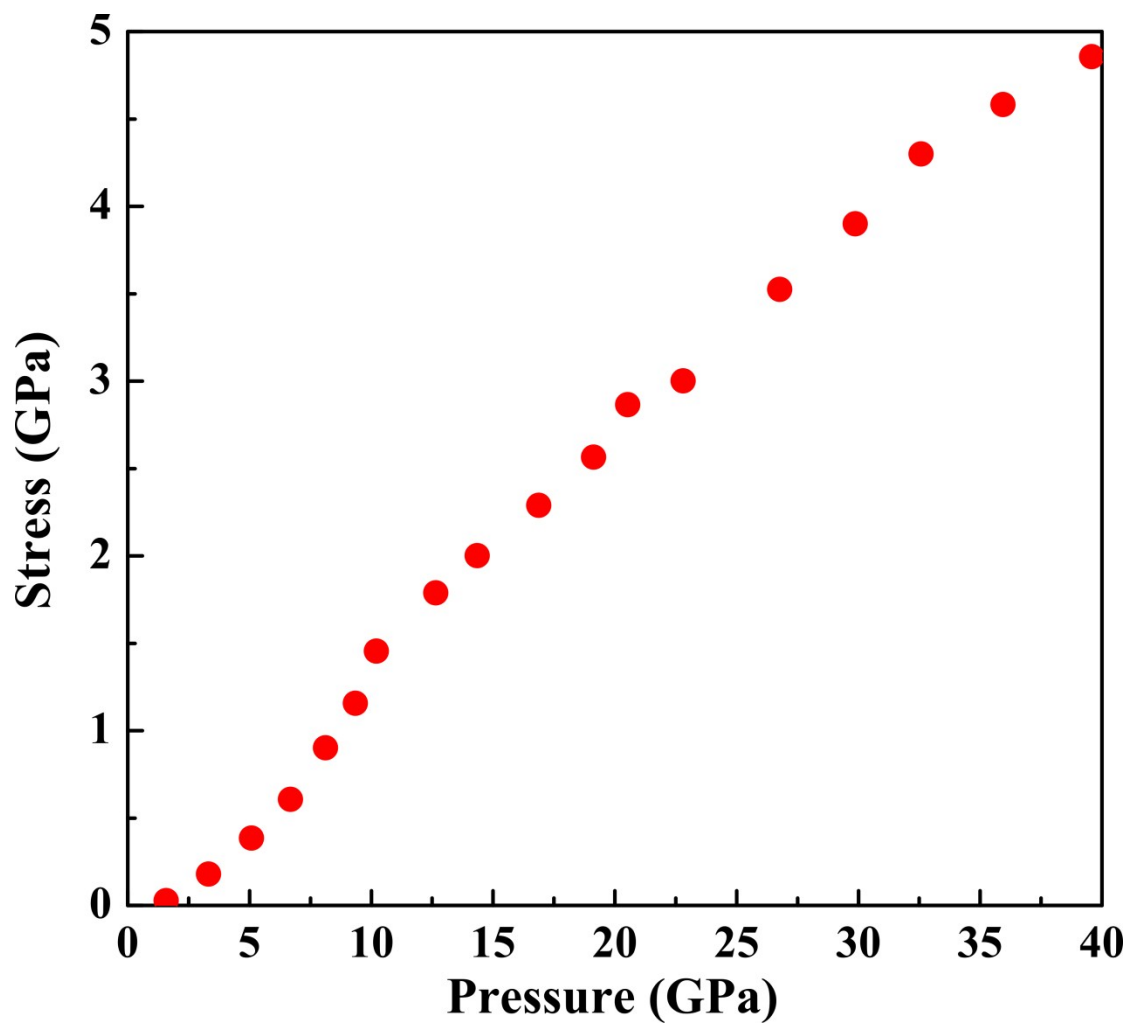

**Fig. S2** The uniaxial stress of sample at the pressure range of 1.5–39.6 GPa.
